# Supplementary material for: Autoantibodies against glucose-regulated protein 78 as serological biomarkers in metastatic and recurrent hepatocellular carcinoma
Source: PubMed Central journal article supplement (PMC5421892; doi:10.18632/oncotarget.15192), 2017-02-08
Supplement: oncotarget-08-24828-s001.pdf [file oncotarget-08-24828-s001.pdf]

## Autoantibodies against glucose-regulated protein 78 as serological biomarkers in metastatic and recurrent hepatocellular carcinoma

### SUPPLEMENTARY TABLES

**Supplementary Table 1: Frequency of autoantibodies against the autoantigens in sera from patients with hepatocellular carcinoma, liver cirrhosis, chronic hepatitis, and sera from normal human individuals**

| molecular weight (kDa) | frequency    |           |            |            |
|------------------------|--------------|-----------|------------|------------|
|                        | HCC          | LC        | CH         | NHS        |
| 113                    | 11% (11/100) | -         | -          | 3% (1/30)  |
| 112                    | 14% (14/100) | -         | 10% (3/30) | 3% (1/30)  |
| 98                     | 12% (12/100) | 3% (1/30) | 10% (3/30) | 3% (1/30)  |
| 76                     | 14% (14/100) | -         | 3% (1/30)  | 10% (3/30) |

-, no detected; HCC, hepatocellular carcinoma; LC, liver cirrhosis; CH, chronic hepatitis; NHS, normal human serum.

**Supplementary Table 2: The identified 566 proteins by proteomic approach.**

See Supplementary File 1

Supplementary Table 3: Clinicopathological characteristics of recruited participants (n=494)

| Variable              | HCC         | N          | LC         | CH         | <i>p</i> |
|-----------------------|-------------|------------|------------|------------|----------|
|                       | n=173       | n=101      | n=110      | n=110      |          |
| Age                   |             |            |            |            | <0.001   |
| Mean                  | 52.84       | 52.72      | 51.75      | 47.05      |          |
| Range                 | 26-78       | 22-86      | 32-82      | 24-79      |          |
| Sex, n(%)             |             |            |            |            | 0.756    |
| Male                  | 145 (83.8%) | 83 (82.2%) | 92 (83.6%) | 87 (79.1%) |          |
| Female                | 28 (16.2%)  | 18 (17.8%) | 18 (16.4%) | 23 (20.9%) |          |
| TNM stage(AJCC)       |             |            |            |            |          |
| I                     | 30 (17.3%)  |            |            |            |          |
| II                    | 25 (14.5%)  |            |            |            |          |
| III                   | 85 (49.1%)  |            |            |            |          |
| IV                    | 14 (8.1%)   |            |            |            |          |
| Missing               | 19 (11.0%)  |            |            |            |          |
| histological grade    |             |            |            |            |          |
| I                     | 5 (2.9%)    |            |            |            |          |
| II                    | 79 (45.7%)  |            |            |            |          |
| III                   | 37 (21.4%)  |            |            |            |          |
| Missing               | 52 (30.1%)  |            |            |            |          |
| Tumor size            |             |            |            |            |          |
| ≤3 cm                 | 28 (16.2%)  |            |            |            |          |
| >3 cm                 | 95 (54.9%)  |            |            |            |          |
| Missing               | 50 (28.9%)  |            |            |            |          |
| Capsular infiltration |             |            |            |            |          |
| Negative              | 26 (15.0%)  |            |            |            |          |
| Positive              | 83 (48.0%)  |            |            |            |          |
| Missing               | 64 (37.0%)  |            |            |            |          |
| portal vein invasion  |             |            |            |            |          |
| Negative              | 106 (61.3%) |            |            |            |          |
| Positive              | 43 (24.9%)  |            |            |            |          |
| Missing               | 24 (13.9%)  |            |            |            |          |
| metastasis            |             |            |            |            |          |
| Negative              | 156 (90.2%) |            |            |            |          |
| Positive              | 8 (4.6%)    |            |            |            |          |
| Missing               | 9 (5.2%)    |            |            |            |          |

HCC, hepatocellular carcinoma; LC, liver cirrhosis; CH, chronic hepatitis; N, normal controls; TNM, T, Tumor; N, Node; M, Metastasis; AJCC, American Joint Committee on Cancer Staging;
